# Supplementary material for: Rapid identification of pathogens, antibiotic resistance genes and plasmids in blood cultures by nanopore sequencing
Source: PubMed Central journal article supplement (PMC7203151; doi:10.1038/s41598-020-64616-x), 2020-05-06
Supplement: 41598_2020_64616_MOESM1_ESM.pdf [file 41598_2020_64616_MOESM1_ESM.pdf]

# **Rapid identification of pathogens, resistance genes and plasmids for blood stream infection diagnosis using nanopore sequencing**

Arne M. Taxt<sup>1,2</sup>, Ekaterina Avershina<sup>2</sup>, Stephan A. Frye<sup>1</sup>, Umaer Naseer<sup>3</sup> & Rafi Ahmad<sup>2,4,\*</sup>

<sup>1</sup>*Department of Microbiology, Division of Laboratory Medicine, Oslo University Hospital, PB 4956 Nydalen, 0424 Oslo, Norway*

<sup>2</sup>*Department of Biotechnology, Inland Norway University of Applied Sciences, Holsetgata 22, 2317 Hamar, Norway*

<sup>3</sup>*Department of Zoonotic, Food- and Waterborne Infections, 0213 Oslo, Norwegian Institute of Public Health, Oslo, Norway*

<sup>4</sup>*Institute of Clinical Medicine, Faculty of Health Sciences, UiT - The Arctic University of Norway, Hansine Hansens veg 18, 9019 Tromsø, Norway*

\*Corresponding author

rafi.ahmad@inn.no

## **Supplementary Material**

## Supplementary Figures

**Supplementary Figure 1.** DNA extraction results for comparison of the two methods used. Concentrations were measured using the Qubit dsDNA HS assay system. Mean with standard error of the mean (SEM) are indicated by horizontal lines and error bars, respectively.

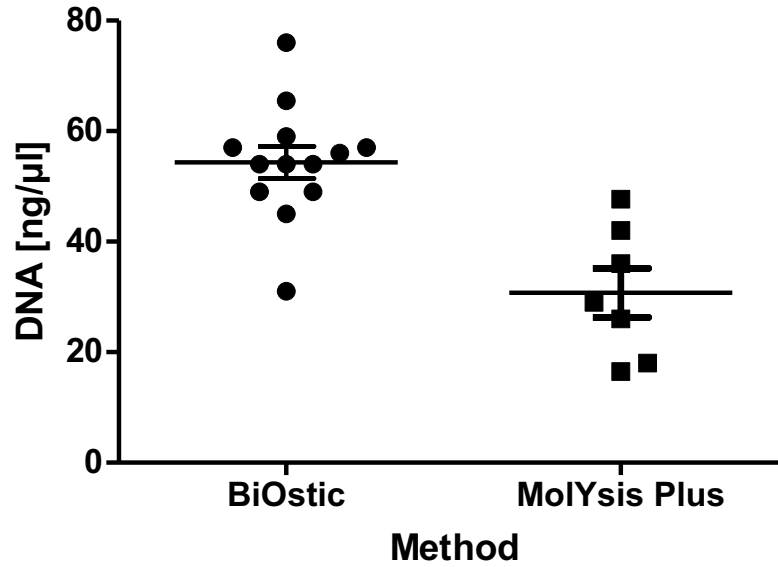

**Supplementary Figure 2.** Distribution of read lengths of sequence data from nanopore sequencing of DNA purified from blood cultures. Red dashed line denotes typical Illumina single end read length of 300 bp; *n* denotes number of reads with length below/above 300 bp.

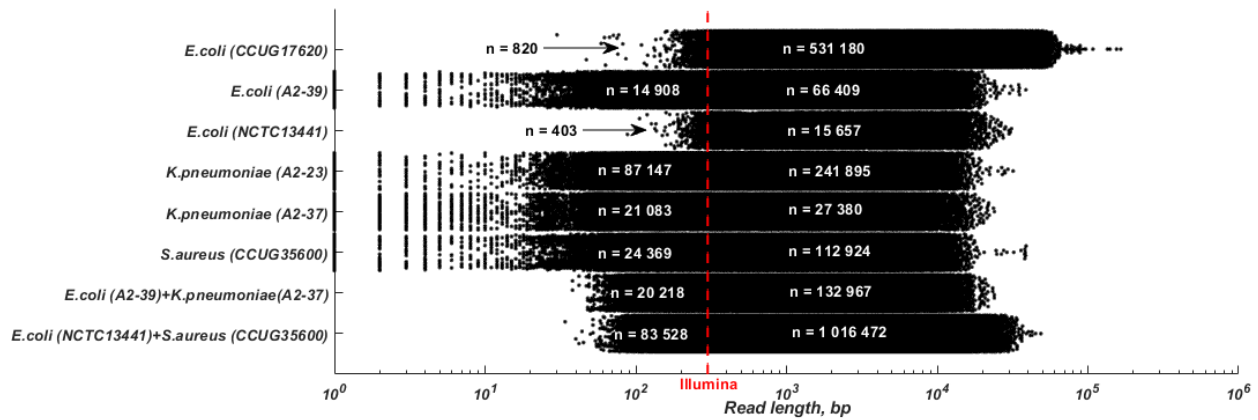

**Supplementary Figure 3.** BLAST search of the *Salmonella enterica* Centrifuge-assigned reads through the NCBI RefSeq database

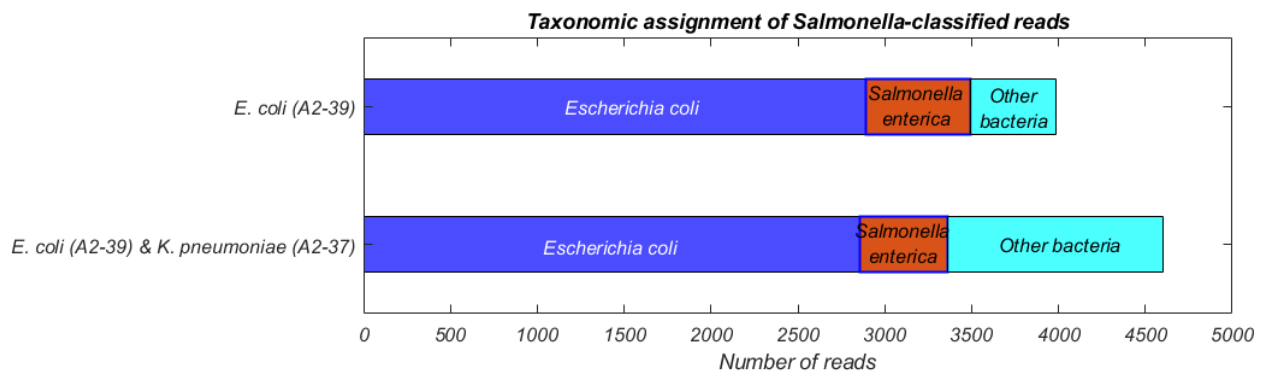

**Supplementary Figure 4.** Taxonomy assignment of spiked blood cultures. A. BLAST search against the RefProk database of the first output file approx. 10 minutes after the sequencing start. B. Centrifuge assignment of the first 15 output files.

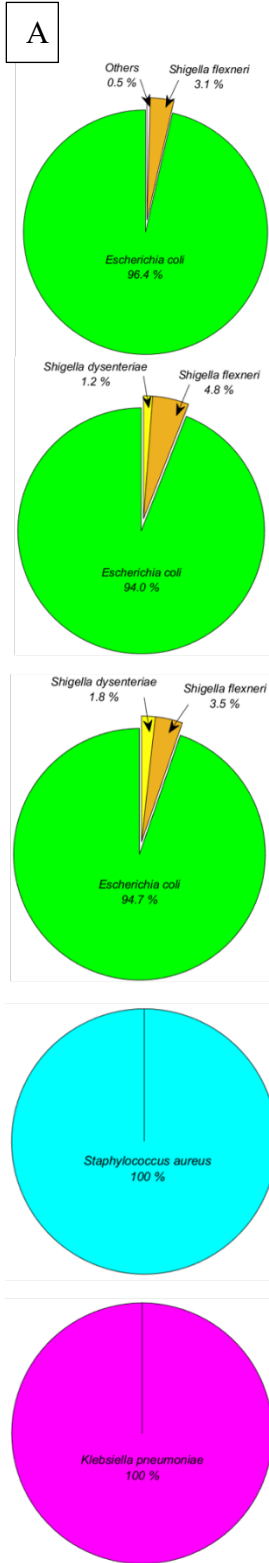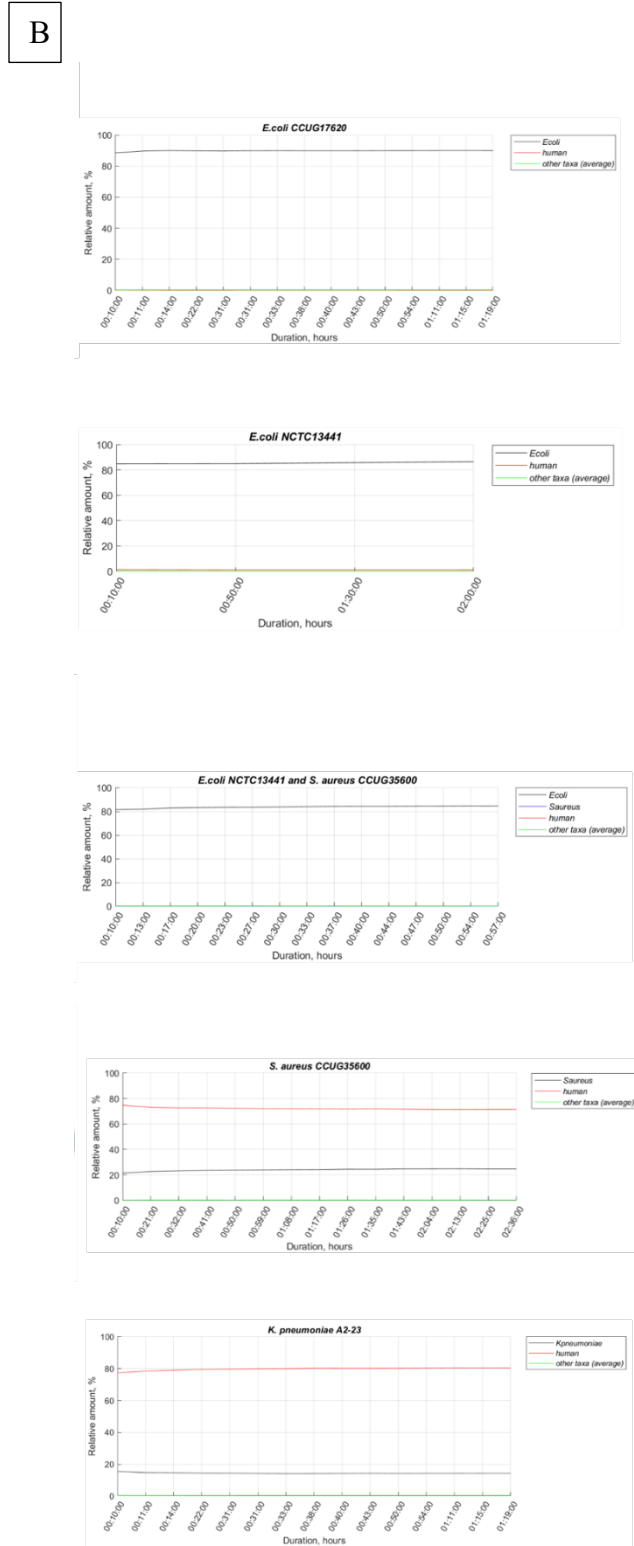

**Supplementary Figure 5.** Number of various CTX-M variants that were detected by BLAST search of the raw MinION sequencing reads through the CARD and ResFinder resistance genes databases. L – length in base pairs (bp); ID – similarity to the database entry, %

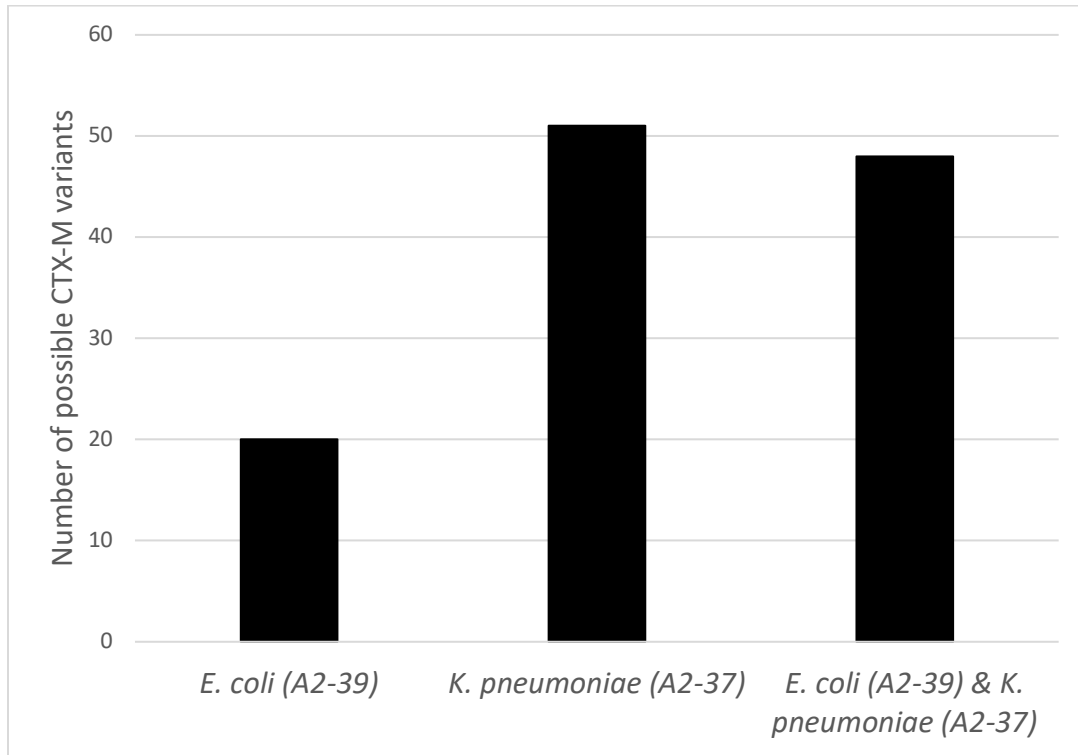

**Supplementary Figure 6.** Centrifuge taxonomy assignment of Illumina sequencing reads

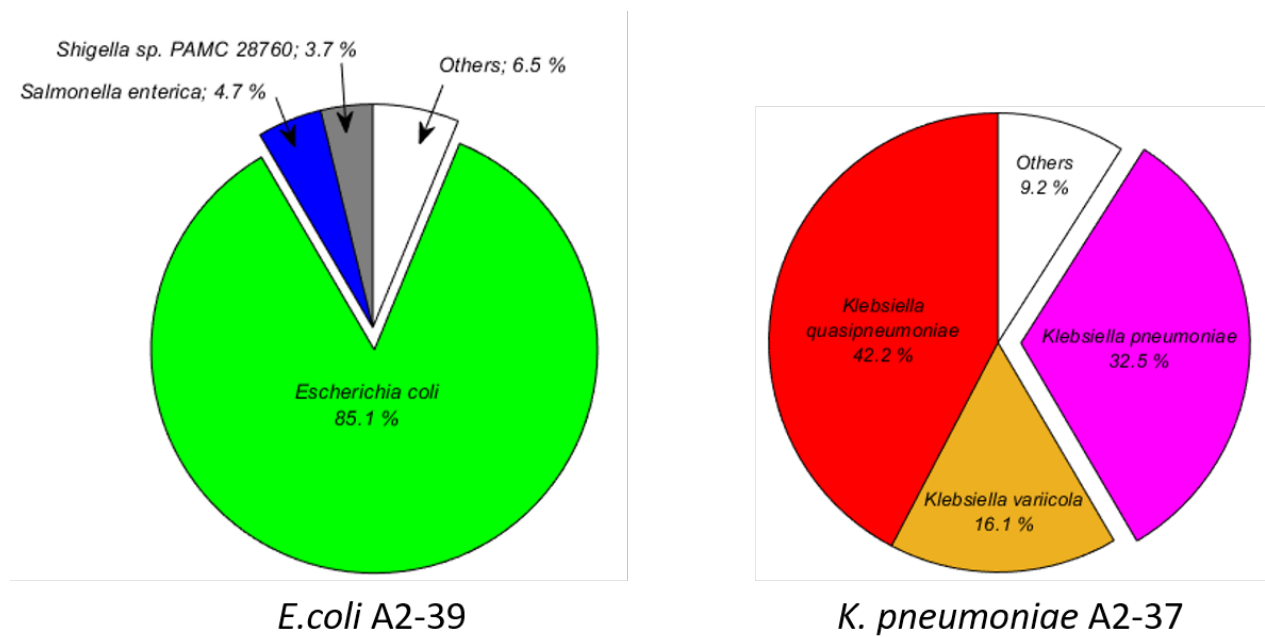

**Supplementary Figure 7.** Mapping of the *Shigella* identified reads to the hybrid assembly of *Escherichia coli* A2-39

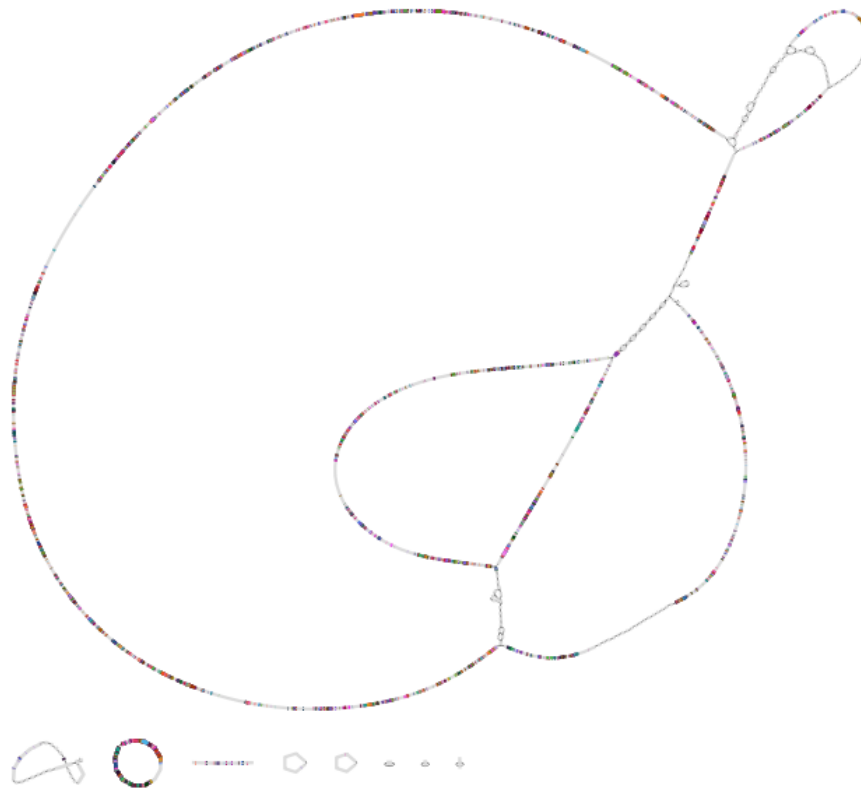

## Supplementary Tables

**Supplementary Table 1.** Assembly statistics

| Isolate                      | Sequencing data | Number of contigs | total length, bp | Longest contig, bp | N50, bp   |
|------------------------------|-----------------|-------------------|------------------|--------------------|-----------|
| <i>E. coli</i> (A2-39)       | MinION          | 79                | 6 675 137        | 2 133 209          | 714 352   |
|                              | Illumina        | 803               | 6 145 589        | 203 165            | 87 318    |
|                              | MinION+Illumina | 60                | 5 973 956        | 2 757 734          | 996 338   |
| <i>K. pneumoniae</i> (A2-37) | MinION          | 42                | 661 270          | 59 663             | 17 750    |
|                              | Illumina        | 1763              | 6 516 794        | 489 097            | 173 565   |
|                              | MinION+Illumina | 28                | 5 562 393        | 2 952 449          | 2 952 449 |
| <i>K. pneumoniae</i> (A2-23) | MinION          | 158               | 4 119 608        | 123 525            | 35 892    |
|                              | Illumina        | 878               | 6 208 496        | 587 610            | 186 930   |
|                              | MinION+Illumina | 15                | 5 562 393        | 2 952 449          | 2 952 449 |

**Supplementary Table 2.** PlasmidFinder search of the *de novo* hybrid assemblies.

| Bacterial culture            | PlasmidFinder      |                       |             |
|------------------------------|--------------------|-----------------------|-------------|
|                              | Plasmid type       | Query/ HSP length, bp | Identity, % |
| <i>E. coli</i> (A2-39)       | <i>IncHI2</i>      | 327/327               | 100         |
|                              | <i>IncHI2A</i>     | 630/630               | 99.5        |
|                              | <i>p0111</i>       | 885/885               | 98.9        |
| <i>K. pneumoniae</i> (A2-37) | <i>IncFII</i>      | 258/261               | 100         |
|                              | <i>IncFIA(HI1)</i> | 388/388               | 97.2        |
|                              | <i>IncFIB(K)</i>   | 560/560               | 98.8        |
